# Supplementary material
Source: publisher figshare collection journal article supplement (https://tandf.figshare.com/ndownloader/files/21860487)
Supplement: Supplementary file 1 [file 21860487]

**Supplemental Table 1- Gendered d/Discourse Oppositions**

| **Gendered Identity** | **Identity Discourse Contradiction** | **Data Excerpt Examples: “d” iscourse** |
| --- | --- | --- |
| Feminine | *Girls are…*  *Insecure*  *Conventional*  *Weak*  *Socially motivated* | **SP:** “[Girls might think] maybe I should do stuff with my friends instead. If my friends don't do sports, then I'm not gonna do sports.”  **SP:** “I think boys like to take the pressure and some girls don't like taking pressure because some people say that boys have stronger minds than girls.” |
| Masculine | *Boys are…*  *Confident*  *Competitive*  *Strong*  *Tough* | **SP:** “’Cause boys are more competitive and the pushy kind, so they want to do competitive stuff. People say that they're faster than girls and stuff, so they probably would want to do it more than girls would.”  **P:** “A dad with a son playing football, he wants him to work out and go crush somebody. Then with a girl playing basketball or soccer, he wants you to do really, really well, but also wants you to be a lady and they’re just different… When they're talking about their son being the best at football they're not saying, but also act like a gentleman.” |
| Alternative | *Boys and girls are the same.* | **SP:** “Because they can be the same, like I am. They're different gender, but they can still be the same. They can like the same things. They don't have to like different things.” |

*Note:* The data excerpts presented in this table are exemplars of the macro-level identity discourses related to gender in the research context. These discourses were thematic across participant responses. “SP” denotes a direct quotation from a sport participant interview. “P” denotes a direct quotation from a parent of a sport participant.

**Supplemental Table 2 – Female Athlete d/Discourse Oppositions**

| **Opposition** | **Discourse** | **Opposition Type** | **Data Excerpt: “d”iscourse** |
| --- | --- | --- | --- |
| Collaborative vs. Competitive | *Female athletes should be nice, friendly, kind, and inclusive as well as ambitious, aggressive, and fierce.* | **Identity d/Discourse Paradox:** persistent oppositions that often result in an ironic or absurd outcome | **SP:** “What I learned is how to get along with others, supporting others, and using our …power to make others feel better, and having the courage to speak up for others.”  **SP:** “[I like doing sports] because I’m competitive, I don’t like losing.” |
| Insecure vs. Confident | *Female athletes have identity characteristics of bravery, grit, and self-assurance as well as introversion, and self-consciousness.* | **Identity d/Discourse Dialectic**: negating oppositions with an ongoing dynamic interplay | **SP:** “Even though I'm an athlete, people can still not be mentally tough. For me, I'm an athlete and when I lose, I still get emotional.”  **SP:** “{Words that describe me} Strong, powerful, kind of athletic. Beautiful.” |

*Note*: The data excerpts presented in this table are exemplars of the macro-level identity discourses related to feminine athletic identities in the research context. These discourses were thematic across participant responses. “SP” denotes a direct quotation from a sport participant interview. The category of discourse opposition was derived from Putnam and colleagues’ (2016) review.
